# Supplementary material
Source: Springer Nature journal article supplement (https://www.springermedizin.de/resource/supplementary/12906_2014_1729_MOESM1_ESM.pdf/9522646)

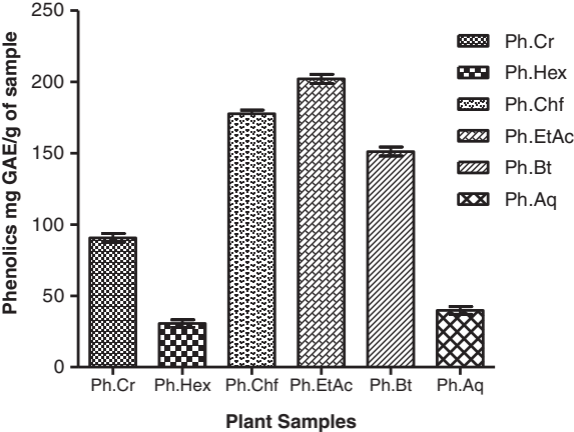

Supplement: MOESM1 [file 9522646]
